# Supplementary material for: Construction of thickness-controllable bimetallic sulfides/reduced graphene oxide as a binder-free positive electrode for hybrid supercapacitors
Source: Royal Society of Chemistry journal article supplement (doi:10.1039/d3ra05326a), 2023-01-01
Supplement: d3ra05326a1.pdf [file d3ra05326a1.pdf]

### Table of Contents Entry

#### Construction of thickness-controllable bimetallic sulfides/reduced graphene oxide as a binder-free positive electrode for hybride supercapacitors

Ramage M. Ghanem<sup>a</sup>, Doaa A. Kospa<sup>a</sup>, Awad I. Ahmed<sup>a</sup>, Amr Awad Ibrahim<sup>a\*</sup>,  
Ahmed Gebreil<sup>b</sup>

<sup>a</sup>*Department of Chemistry, Faculty of Science, Mansoura University, Al-Mansoura 35516, Egypt.*

<sup>b</sup>*Nile Higher Institutes of Engineering and Technology, El-Mansoura, Egypt.*

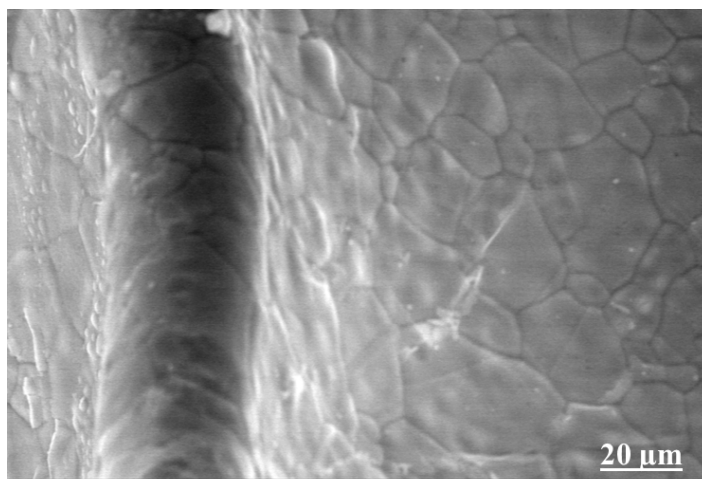

**Fig. S1:** SEM images of NiCuS/5rGO/NF deposited at controllable CV cycles.

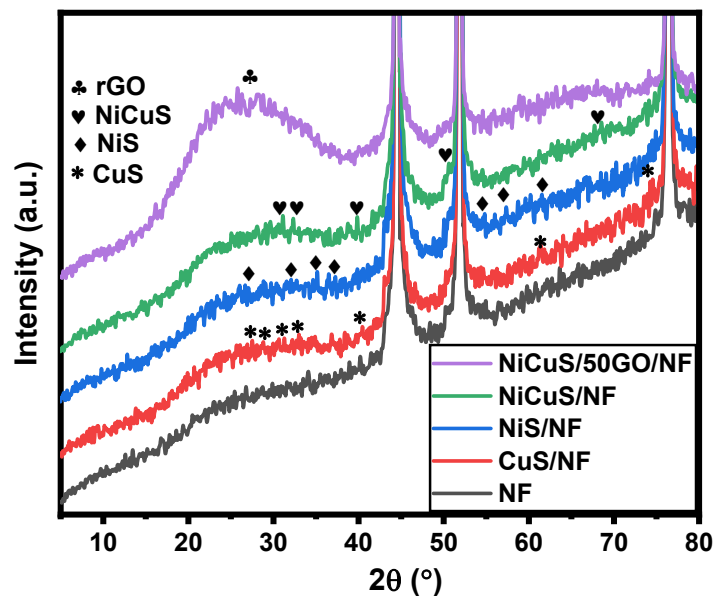

Fig. S2: FT-IR spectra of the as-synthesized materials.

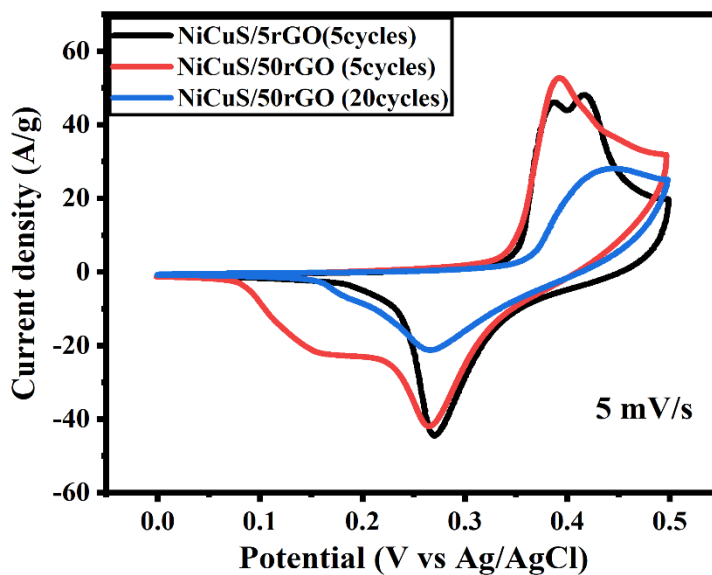

Fig. S3: CV of NiCuS/5rGO and NiCuS/50rGO (5 cycles) and NiCuS/50rGO (20 cycles) at scan rate 5mV/s.

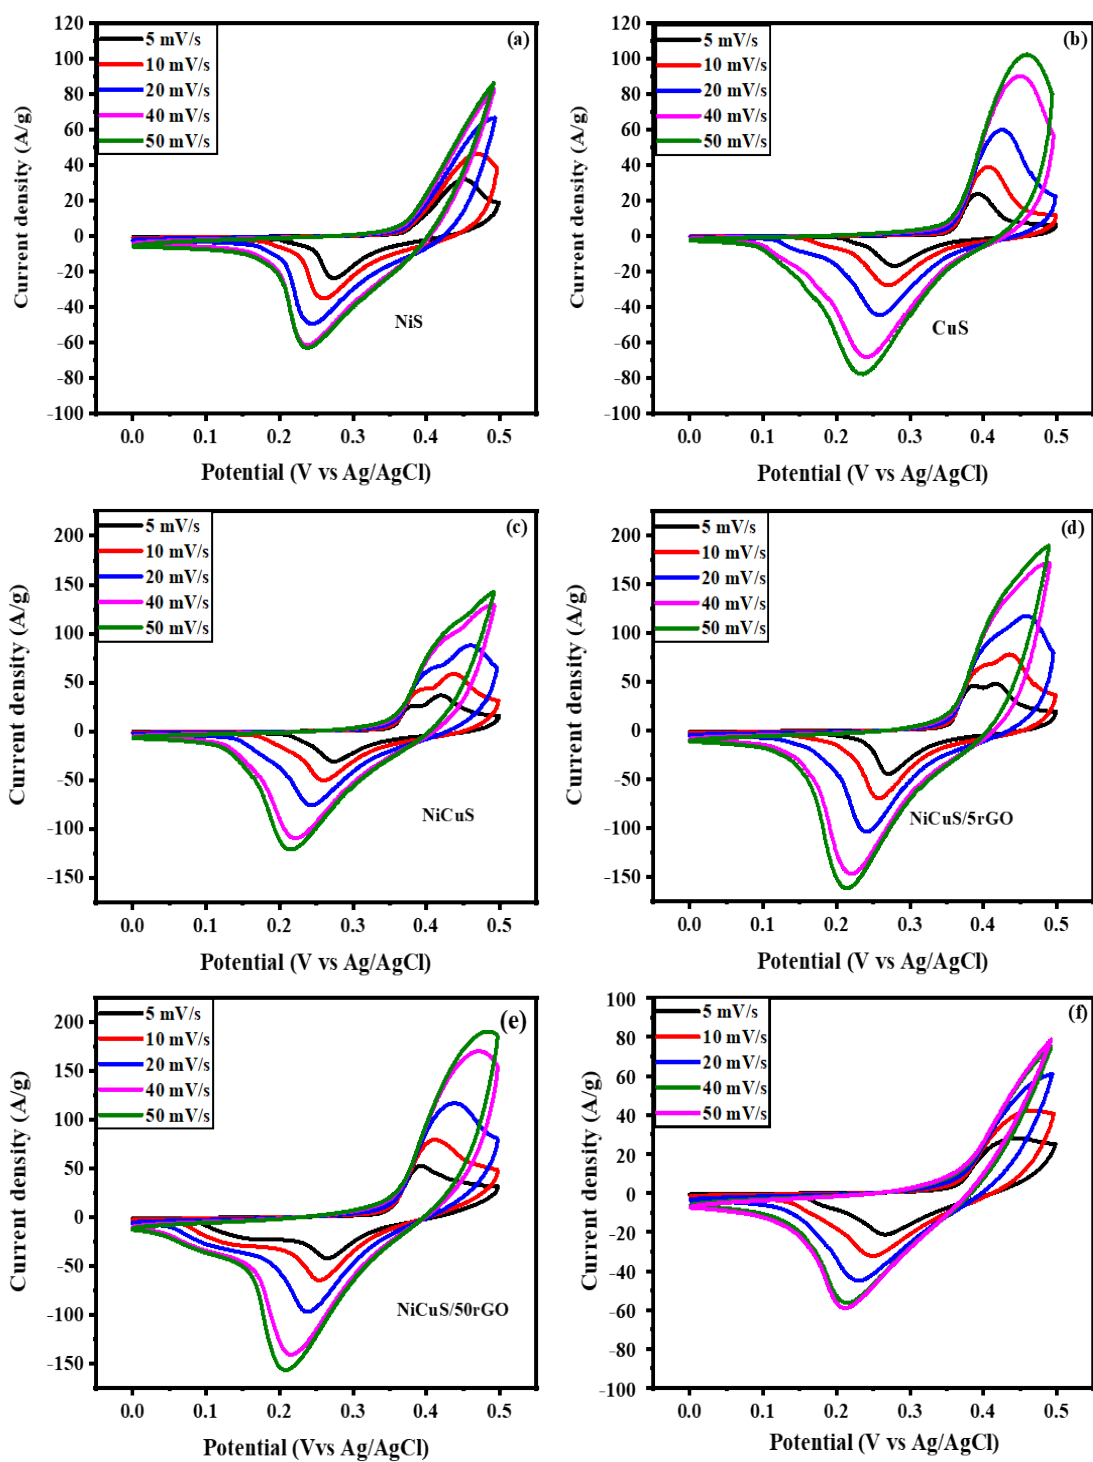

**Fig. S4:** The CV curves of (a) NiS, (b) CuS, (c) NiCuS, (d) NiCuS/5rGO, (e) NiCuS/50rGO (5 cycles), and (f) NiCuS/50rGO (20 cycles) electrodes in the range of 0.0V-0.5V at different scan rates.

### Determination of Electrochemically Active Surface Area (ECSA) of electrocatalysts

The electrical double layer (EDL) capacitance was used to assess the ECSA of the deposition electrodes. In a limited potential window, all electrode CV curves at various scan rates were recorded, as illustrated in S4. The capacitive current ( $i_c$ ) should be in direct proportion to the scan rate ( $v$ ):<sup>1</sup>

$$i_c = vC_{EDL} \quad (1)$$

where  $C_{EDL}$  represents EDL capacitance. Assuming the areal EDL capacitance of carbon ( $C^*$ ) is  $13 \mu\text{F}/\text{cm}^2$  as reported by Ji et al.

To calculate the ECSA, the following equation was applied:

$$ECSA = C_{EDL}/C^* \quad (2)$$

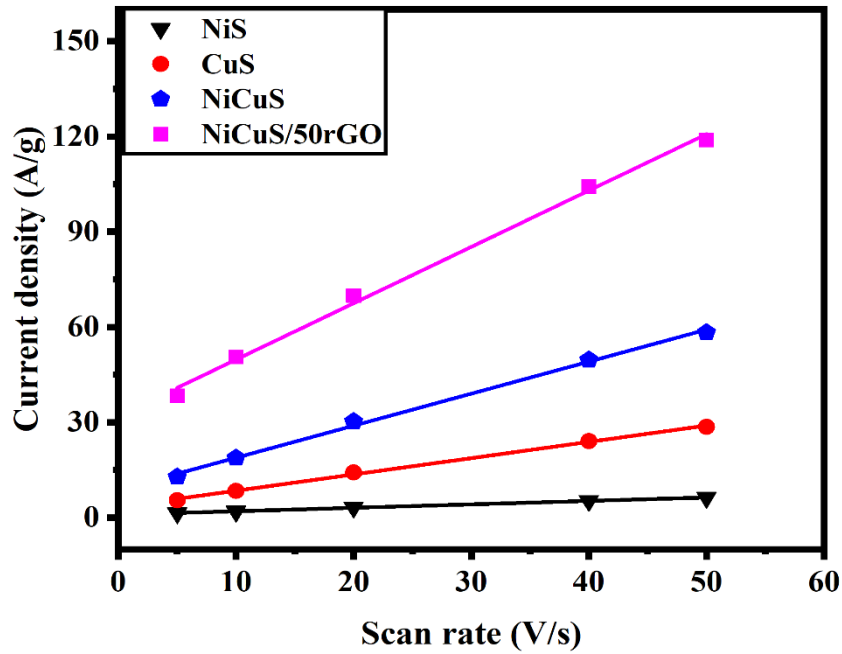

Fig. S5: Capacitive current- scan rate plot of all catalysts.

**Table. S1:** Comparison of previous reports on metal sulfides for supercapacitors with the

| Material                                   | Synthesis                     | Electrolyte    | Capacitance            | Condition              | Retention                      | No. of Cycle | Ref.             |
|--------------------------------------------|-------------------------------|----------------|------------------------|------------------------|--------------------------------|--------------|------------------|
| NiCu <sub>2</sub> S <sub>2</sub> /NF       | Cathodic vacuum arc technique | 2 M KOH        | 1975.2 C/g             | 0.5 mA/cm <sup>2</sup> | 76.8% at 10 mA/cm <sup>2</sup> | 3000         | <sup>2</sup>     |
| NiCu/NF                                    | Cathodic vacuum arc technique | 2 M KOH        | 739.6 C/g              | 0.5 mA/cm <sup>2</sup> | 48.3% at 10 mA/cm <sup>2</sup> | 3000         | <sup>2</sup>     |
| Ni <sub>0.8</sub> Cu <sub>0.2</sub> S/CC   | Hydrothermal                  | 2 M KOH        | 938.6 F/g              | 1 A/g                  | 69 % at 2 A/g                  | 10000        | <sup>3</sup>     |
| NiCuS/NF                                   | Hydrothermal                  | 3 M KOH        | 2.14 F/cm <sup>2</sup> | 1mA/cm <sup>2</sup>    | 72.2% at 50 mA/cm <sup>2</sup> | 10000        | <sup>4</sup>     |
| NiCoS/GO/NF                                | situ chemical transformation  | 6 M KOH        | 1492 F/g               | 1 A/g                  | 96% at 6 A/g                   | 8000         | <sup>5</sup>     |
| CuMnS//AC                                  | electrodeposition             | 1 M KOH        | 1691 F/g               | 10 A/g                 | 94% at 20 A/g                  | 2500         | <sup>6</sup>     |
| Annealed-Co <sub>3</sub> O <sub>4</sub>    | Electrodeposition             | 1 M KOH        | 621F/g                 | 5 mA/cm <sup>2</sup>   | 91.4% at 5 mA/g                | 4000         | <sup>7</sup>     |
| 2D- ZnS/FeS @carbon cloth (CC)             | Hydrothermal                  | 6 M KOH        | 1367.5 F/g             | 3 A/g                  | 87% at 15 A/g                  | 5000         | <sup>8</sup>     |
| CoS <sub>2</sub> -rGO//N-CNT               | Hydrothermal                  | 1 M KOH        | 1417 F/g               | 2 A/g                  | 92% at 10 A/g                  | 5000         | <sup>9</sup>     |
| NiMn <sub>2</sub> O <sub>4</sub> @CoS//SCG | electrodeposition             | 1 M KOH        | 1727 F/g               | 1 A/g                  | 94 % at 10 A/g                 | 5000         | <sup>10</sup>    |
| CuS-NHS (nano hollow sphere)               | hydrothermal method           | 6 M KOH        | 948 F/g                | 1 A/g                  | 90.9% at 2 A/g                 | 1000         | <sup>11</sup>    |
| NiS/GO                                     | hydrothermal method           | 2 M KOH        | 905.3 F/g              | 0.5 A/g                | 90.9% at 4 A/g                 | 2000         | <sup>12</sup>    |
| CuS Nanorods                               | hydrothermal method           | 6 M KOH        | 179 F/g                | 1 A/g                  | 41% at 2 A/g                   | 1000         | <sup>11</sup>    |
| NiCuS/50rGO//AC                            | <b>Electrodeposition</b>      | <b>1 M KOH</b> | <b>920.1 C/g</b>       | <b>1 A/g</b>           | <b>96.2% at 10 A/g</b>         | <b>10000</b> | <b>This work</b> |

fabricated NiCuS/rGO.

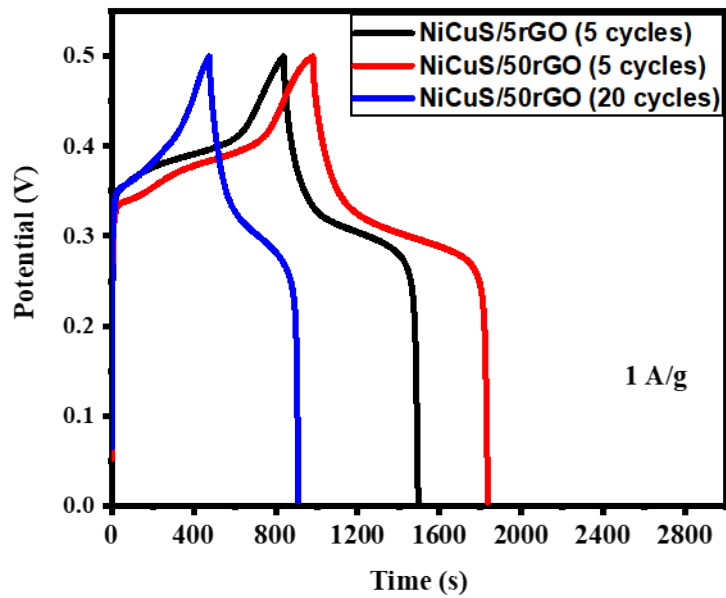

**Figure S6:** Comparison of the GCD curves of NiCuS/5rGO (5 cycles), and NiCuS/50rGO (5 and 20cycles).

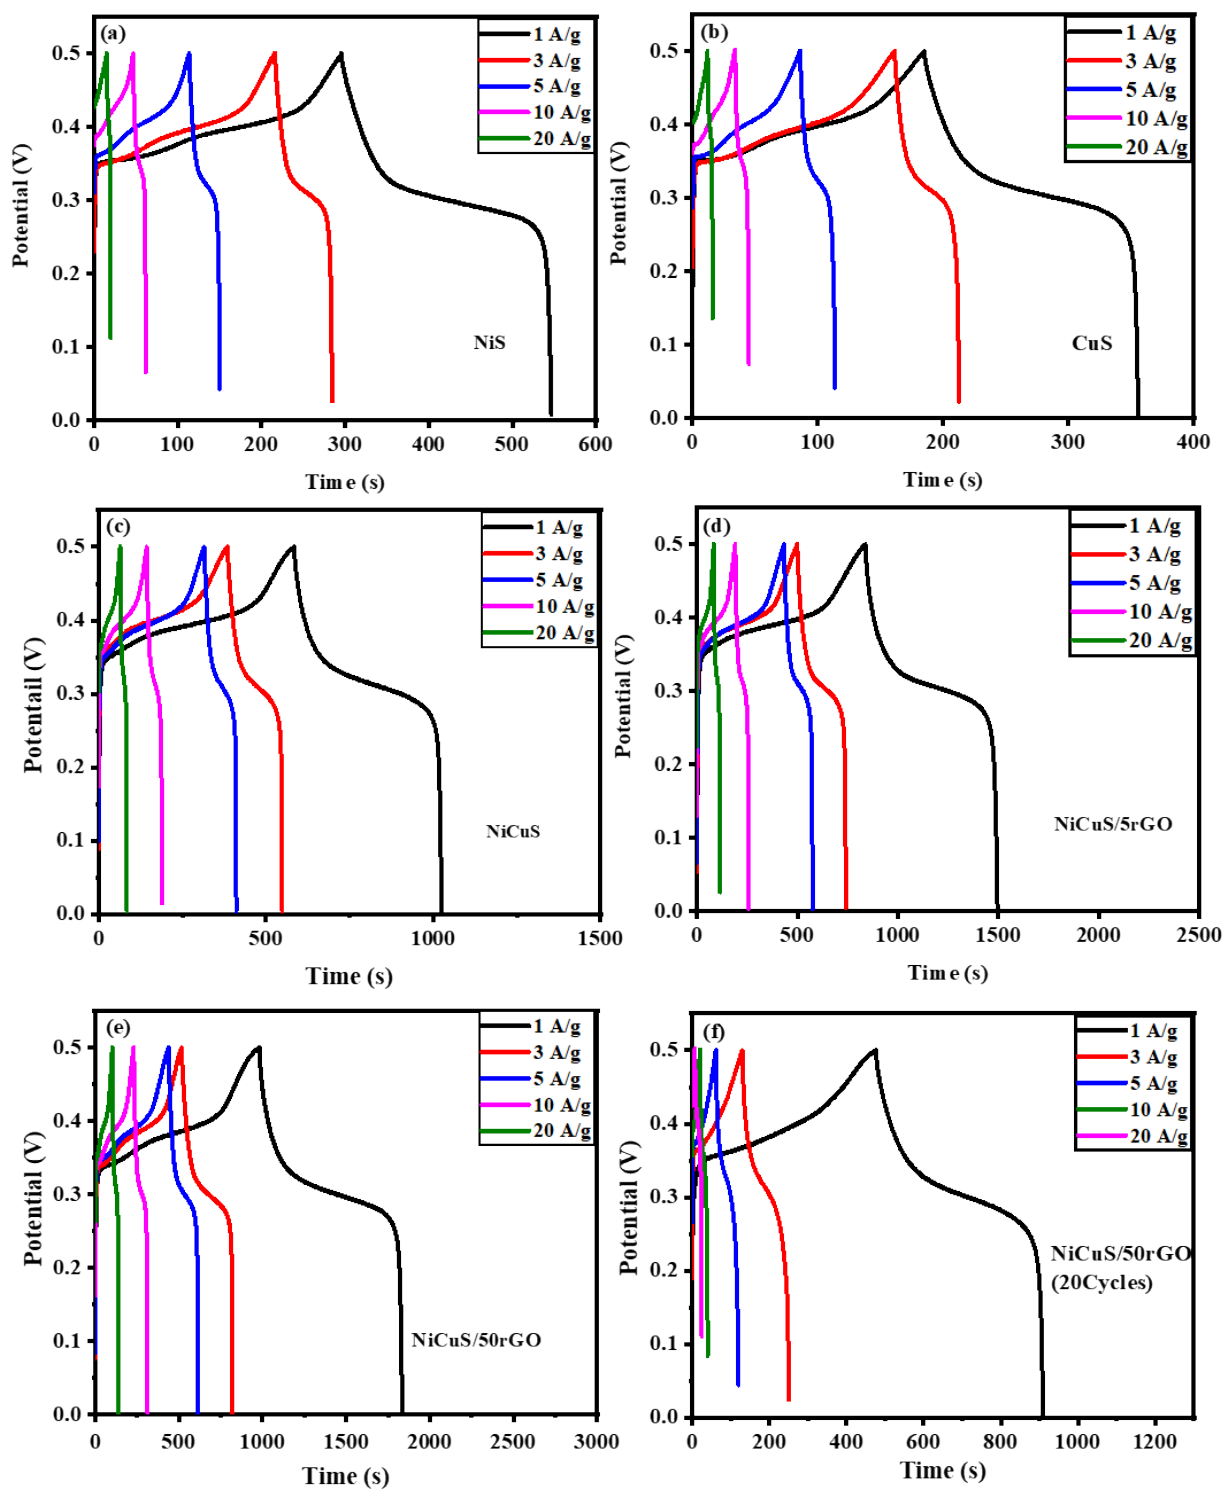

**Figure S7:** GCD curves of (a) NiS, (b) CuS, (c) NiCuS, (d) NiCuS/5rGO, (e) NiCuS/50rGO (5 cycles), and (f) NiCuS/50rGO (20 cycles) at different current densities.

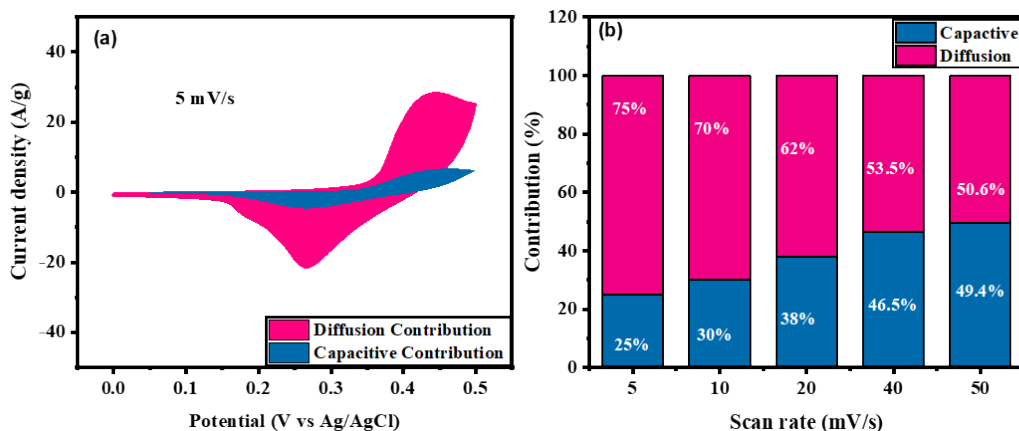

**Fig. S8:** (a) CV plots of diffusion/ capacitive-controlled contributions at 5mV/s and (b) the ratio of diffusion/ capacitive-controlled contributions as a function of scan rate for NiCuS/50rGO (20 cycles).

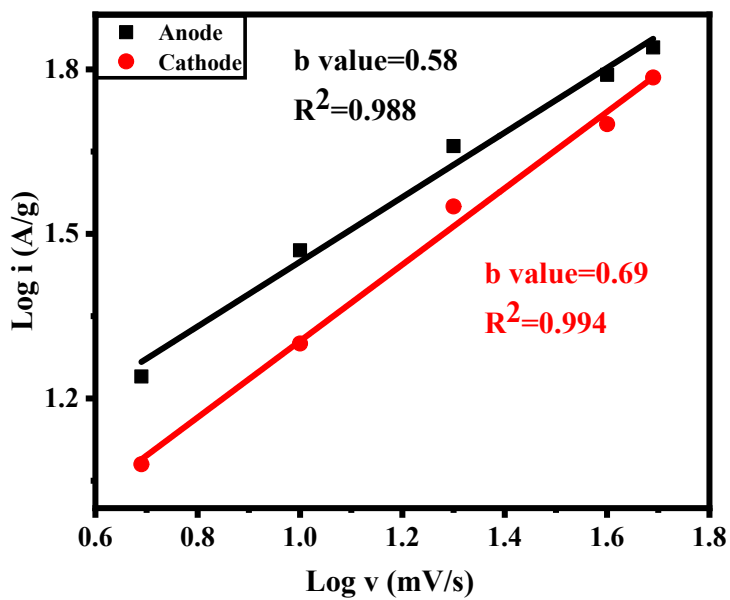

**Fig. S9:** The relationship between the log (i) and the log(v) of NiCuS/50rGO (50 cycles).



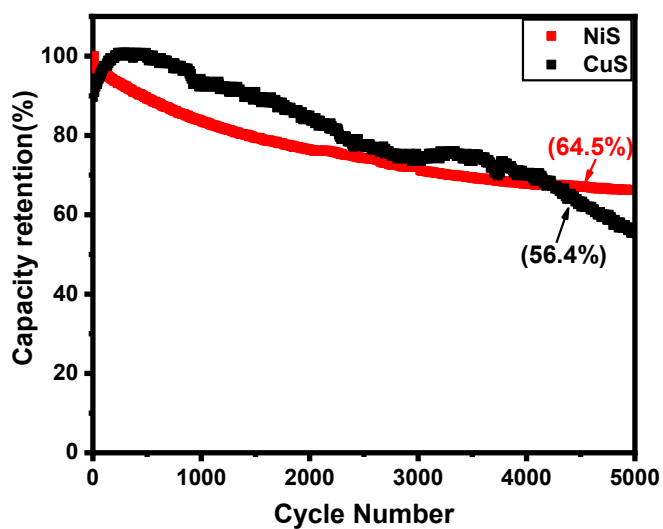

**Fig. S10:** Cycling stability comparison of NiS and CuS electrodes at 20 A/g.

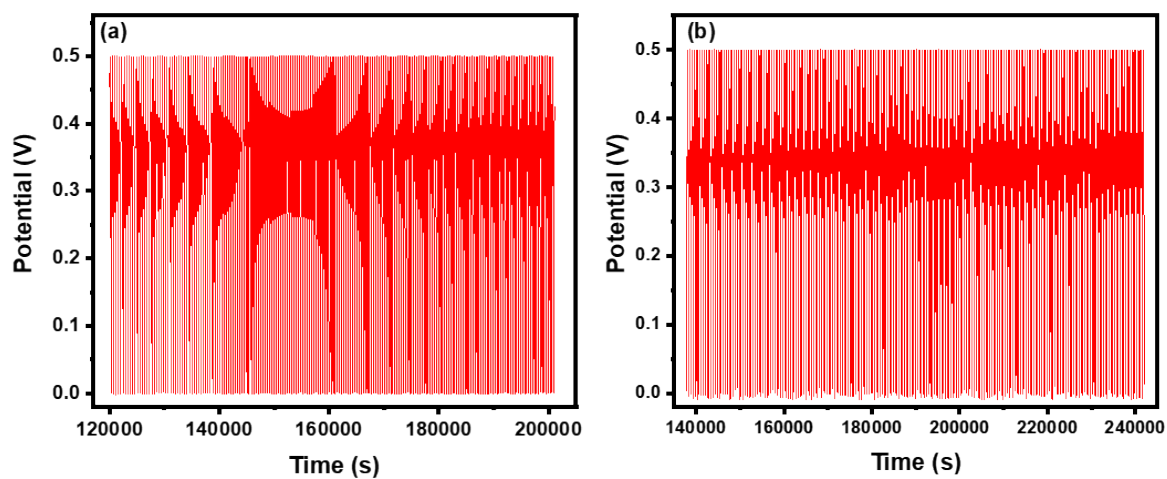

**Fig. S11:** GCD stability test for (a) NiCuS and (b) NiCuS/50 rGO (5 cycles) for 5000 cycles at 20 A/g current density.

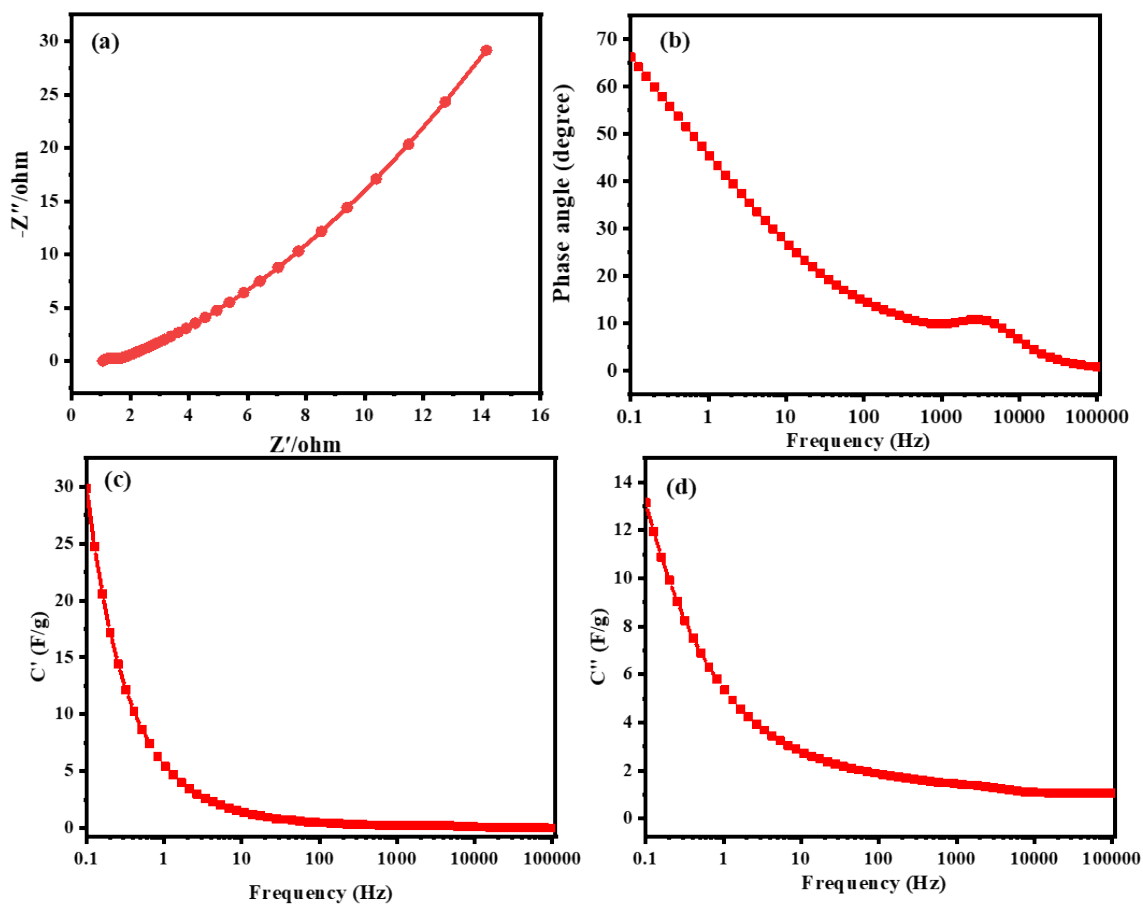

**Fig. S12:** Nyquist plots of NiCuS/50rGO/NF//AC device from 0.1 Hz to 100 kHz in 0.1 KOH. (a), Bode plots (b), and the real (c) and imaginary (d) capacitances of device versus frequency.

## References

1. F. Zhang, H. Liu, Z. Wu, J. Zhang, E. Cui, L. Yue and G. Hou, *ACS Appl. Energy Mater.*, 2021, **4**, 6719-6729.
2. Y. Cheng, M. Zhai and J. Hu, *Appl Surf Sci*, 2019, **480**, 505-513.
3. D. Du, R. Lan, J. Humphreys, H. Amari and S. Tao, *Electrochim Acta*, 2018, **273**, 170-180.
4. X. Xun, H. Liu, Y. Su, J. Zhang, J. Niu, H. Zhao, G. Zhao, Y. Liu and G. Li, *J Solid State Chem*, 2019, **275**, 95-102.
5. J. Yang, C. Yu, X. Fan, S. Liang, S. Li, H. Huang, Z. Ling, C. Hao and J. Qiu, *Energy Environ. Sci.*, 2016, **9**, 1299-1307.
6. M. Z. Iqbal, S. Zakar, S. S. Haider, A. M. Afzal, M. J. Iqbal, M. A. Kamran and A. Numan, *Ceramics International*, 2020, **46**, 21343-21350.
7. M. Kalyani and R. N. Emerson, *J Mater Sci: Mater Electron*, 2019, **30**, 1214-1226.
8. M. S. Javed, T. Najam, M. Sajjad, S. S. A. Shah, I. Hussain, M. Idrees, M. Imran, M. A. Assiri and S. H. Siyal, *Energy Fuels*, 2021, **35**, 15185-15191.
9. B. Hu, H. Li, A. Liu, C. Yue, Z. Guo, J. Mu, X. Zhang and H. Che, *ACS Appl. Energy Mater.*, 2021, **4**, 88-97.
10. N. Hu, L. Huang, W. Gong and P. K. Shen, *ACS Sustain Chem Eng*, 2018, **6**, 16933-16940.
11. H. Heydari, S. E. Moosavifard, S. Elyasi and M. Shahraki, *Appl Surf Sci*, 2017, **394**, 425-430.
12. J. Yang, X. Duan, W. Guo, D. Li, H. Zhang and W. Zheng, *Nano Energy*, 2014, **5**, 74-81.
